# Supplementary material for: Engineering a pyrene MOF composite photocatalyst toward the formation of carbon dioxide radical anions through regulating the charge transfer from type II to Z scheme via a chemical bond-modulated strategy
Source: Royal Society of Chemistry journal article supplement (doi:10.1039/d4qi02072c), 2024-01-01
Supplement: d4qi02072c1.pdf [file d4qi02072c1.pdf]

**Engineering a pyrene MOF composite photocatalyst toward the formation of carbon dioxide radical anion through regulating the charge transfer from type-II to Z-scheme via a chemical bond-modulated strategy**

Xin Zhao,<sup>a</sup> Yajun Zhao,<sup>a</sup> Yuan-Peng Li,<sup>a</sup> Pengbo Lyu,<sup>\*c</sup> Chunying Chen,<sup>d</sup> Zong-Wen Mo,<sup>a,b</sup> Chao Peng,<sup>a,b</sup> Jiewei Liu<sup>\*a,b</sup> and Li Zhang<sup>\*d</sup>

<sup>a</sup> School of Environmental and chemical Engineering, Jiangmen Key Laboratory of Synthetic Chemistry and Cleaner Production, Institute of Carbon Peaking and Carbon Neutralization, Wuyi University, Jiangmen 529020, P.R. China. E-mail addresses: wyuchemliujw@126.com

<sup>b</sup> Guangdong Provincial Laboratory of Chemistry and Fine Chemical Engineering Jieyang Center, Jieyang 515200, China.

<sup>c</sup> Hunan Provincial Key Laboratory of Thin Film Materials and Devices, School of Materials Science and Engineering, Xiangtan University, Xiangtan 411105, China. E-mail addresses: pengbo.lyu@xtu.edu.cn

<sup>d</sup> School of Chemistry, Sun Yat-Sen University, Guangzhou 510006, China. E-mail addresses: zhli99@mail.sysu.edu.cn

## Contents

|                                                                                |     |
|--------------------------------------------------------------------------------|-----|
| 1. General Information .....                                                   | S5  |
| 2. Experimental section.....                                                   | S6  |
| 3. Characterization of the photocatalysts .....                                | S8  |
| 4. Photocatalytic Cyclization of Propargylic Amines with CO <sub>2</sub> ..... | S15 |
| 5. Reaction mechanism study .....                                              | S21 |
| 6. Characterizations of propargylic amines and oxazolidinones .....            | S23 |

## Captions for Figures and Tables

**Figure S1.** PXRD patterns of WYU-11, CdS, CdS@WYU-11 and CdS@WYU-11-Cys composites.

**Figure S2.** PXRD patterns (a), SEM (b), TEM (c), XPS patterns (d) and EDS elemental mapping images (e) of WYU-11-Cys, respectively.

**Figure S3.** TEM images of CdS@WYU-11-Cys.

**Figure S4.** High resolution TEM images of CdS@WYU-11 and the size distribution of CdS (left); The lattice fringe of the CdS (right).

**Figure S5.** N<sub>2</sub> adsorption-desorption isotherm of WYU-11, CdS@WYU-11 and CdS@WYU-11-Cys composites at 77 K.

**Figure S6.** UV-vis DRS of WYU-11, CdS, CdS@WYU-11 and CdS@WYU-11-Cys composites.

**Figure S7.** Tauc plot of WYU-11 (a) and CdS (b); Mott-Schottky plot of WYU-11 (c) and CdS (d) in a 0.1 M Na<sub>2</sub>SO<sub>4</sub> solution containing K<sub>3</sub>Fe(CN)<sub>6</sub>/K<sub>4</sub>Fe(CN)<sub>6</sub> (0.01 M).

**Figure S8.** Band structure of WYU and CdS.

**Figure S9.** Scheme illustrating the potential type II or Z-scheme charge transfer pathways between WYU-11 and CdS in the CdS@WYU-11-Cys composites.

**Figure S10.** S 2p of CdS@WYU-11-cys composite in the dark and under visible light irradiation ( $\lambda > 400$  nm).

**Figure S11.** VB-XPS of (a)WYU-11, (b) CdS and (c) WYU-11-Cys, respectively.

**Figure S12.** The cycling experiments of CdS@WYU-11-Cys for the photocatalytic cyclization of CO<sub>2</sub> and propargylic amines.

**Figure S13.** The SEM images of CdS@WYU-11-Cys before (a) and after (b) photocatalysis.

**Figure S14.** The TEM image of CdS@WYU-11-Cys after the second run.

**Figure S15.** The PXRD patterns of CdS@WYU-11-Cys before and after catalytic reaction.

**Figure S16.** XPS spectrum of CdS@WYU-11-Cys before and after catalytic reaction.

**Figure S17.** The cysteamine-grafted configuration and adsorption of *N*-benzylprop-2-yn-1-amine configuration within WYU-11. The distances are in Å.

**Figure S18.** CO<sub>2</sub> isotherms of Cds@WYU-11-Cys at different temperatures.

**Figure S19.** The photocatalytic cyclization reaction of propargylic amine with CO<sub>2</sub> in the presence of MeOH or K<sub>2</sub>S<sub>2</sub>O.

**Figure S20.** The optimized crystal structure (double-cell) in dehydrated form viewing along (a) *a*

(14.24 Å), (b) *b* (11.14 Å) and (c) *c* (32.26 Å) directions.

**Table S1.** EXAFS fitting parameters of the Cd *K*-edge towards WYU-11-Cys.

**Table S2.** Control experiments for the photocatalytic cyclization reaction of propargylic amine (**1a**) with CO<sub>2</sub>.

**Table S3.** Solvent optimization for the photocatalytic cyclization reaction of propargylic amine (**1a**) with CO<sub>2</sub>.

**Table S4.** Comparison of CdS@WYU-11-Cys and other MOF-based catalysts for the cyclization reaction of propargylic amine with CO<sub>2</sub>.

## 1. General information

All reagents and solvents used in this work were purchased from commercial supplies without further purification. Powder X-ray diffraction (PXRD) studies were carried out on a Rigaku MiniFlex 600-C diffractometer (Bragg-Brentano geometry, Cu-K $\alpha$  radiation,  $\lambda$ = 1.54178 Å).  $^1\text{H}$  NMR was recorded on Bruker AVANCE III 500(500 MHz). XPS analyses were performed on a Thermo Scientific ESCALAB 250Xi with a monochromatized micro-focused Al K $\alpha$  X-ray source provided by eceshi ([www.eceshi.com](http://www.eceshi.com)). Binding energies (BE) were calibrated by setting the measured BE of C 1s to 284.65 eV. UV-vis absorption spectra were recorded on a Shimadzu UV-3600 Plus spectrometer. Fluorescence spectra were measured on an Edinburgh FLS1000 Photoluminescence Spectrometer. The fluorescence lifetime experiments were performed in the time-correlated single photo counting (TCSPC) methods by using 340 nm picoseconds pulsed diode laser. The sorption isotherms were measured with an ASAP 2460/2020 gas sorption analyzer. Scanning electron microscopy (SEM) analysis was performed using a Zeiss Gemini SEM 500 apparatus. Transmission electron microscopy (TEM) investigations was performed by Tecnai G2 F20 S-TWIN. High-angle annular dark-field scanning TEM (HAADF-STEM) was performed by Thermo Scientific Themis Z. Samples for SEM tests were dispersed in EtOH with the aid of sonication, and then deposited on a conductive tape. Prior to TEM measurements, samples were dispersed in ethanol using a sonication method, and then mounted on a carbon coated copper grid.

## **2. Experimental section**

### **2.1 Synthesis of CdS particles**

Typically,  $\text{Cd}(\text{CH}_3\text{COO})_2 \cdot 2\text{H}_2\text{O}$  (133.3 mg, 0.5 mmol) is added into 20 mL of dry ethanol, then the whole mixture are kept stirring and reflux at 80 °C for 12 h. The CdS particles are separated by centrifugation and washed with distilled water for several time and dried under vacuum at 60 °C overnight.

### **2.2 Photoelectrochemical characterization**

Photoelectrochemical measurements were performed on a CHI 660E electrochemical work station (Chenhua Instrument, Shanghai, China) in a standard three-electrode system with the sample-coated FTO, Pt plate and Ag/AgCl as the working electrode, counter electrode and reference electrode, respectively. The as-synthesized samples (5 mg) were added into Dupont D520 Nafion (25  $\mu\text{L}$ ) and ethanol (0.2 mL) mixed solution, giving a suspension, and then the working electrodes were prepared by dropping the suspension onto the surface of a FTO plate. The working electrodes were dried at room temperature. The photocurrent was measured using constant voltage tracking (CVT) using a 0.1 M  $\text{Na}_2\text{SO}_4$  solution containing  $\text{K}_3\text{Fe}(\text{CN})_6/\text{K}_4\text{Fe}(\text{CN})_6$  (0.01 M) as the electrolyte. A 300 W Xe lamp ( $\lambda \geq 400$  nm) was used as the light source, and a shutter was used to modulate the light and dark conditions during the test. Photo-responsive signals of the samples were measured under chopped light at  $10^{-5}$  V. The electrochemical impedance spectroscopy (EIS) was performed in frequency range from  $10^{-2}$  to  $10^3$  Hz with a bias potential of 0.005 V. The Mott-Schottky measurements were performed at frequencies of 500, 1000, and 1500 Hz, respectively.

### **2.3 In situ irradiated X-ray photoelectron spectroscopy (ISI-XPS)**

In situ irradiated X-ray photoelectron spectroscopy (XPS) measurements were conducted on a Thermo Scientific ESCALAB 250Xi with a monochromatized micro-focused Al Ka X-ray source. All binding energies were referenced to the adventitious C 1s line at 248.4 eV. A 300 W Xe lamp ( $\lambda \geq 400$  nm) (Perfect Light) was kept  $\approx 15$  cm away from the samples as a light source.

## 2.4 EPR radicals trapping experiments

The spectra were collected from a Bruker EMXnano spectrometer at room temperature using 5,5-Dimethyl-1-pyrroline N-oxide (DMPO) as radical trapping agent. The DMPO- $\bullet\text{CO}_2^-$  adduct was obtained from the mixing of 20  $\mu\text{L}$  solution A (10 mg of the sample powder dispersing in 2 mL  $\text{CH}_3\text{CN}$ ) and 20  $\mu\text{L}$  solution B (20  $\mu\text{L}$  of DMPO added into 200  $\mu\text{L}$   $\text{CH}_3\text{CN}$ ), which was irradiation under atmospheric  $\text{CO}_2$  and visible light ( $\lambda \geq 400$  nm) for 5 min.

### 3. Characterization of the photocatalysts

**Table S1.** EXAFS fitting parameters of the Cd *K*-edge towards WYU-11-Cys

| Sample     | Path      | CN   | $R/\text{\AA}$ | $\sigma^2(\text{\AA}^2)$ | $\Delta E_0(\text{eV})$ | $R$ factor |
|------------|-----------|------|----------------|--------------------------|-------------------------|------------|
| CdO        | Cd–O      | 5.9  | 2.34           | 0.009                    | 3.8                     | 0.01       |
|            | Cd–O–Cd   | 12.4 | 3.32           | 0.003                    | 1.45                    |            |
| WYU-11-Cys | Cd–O/Cd–N | 4.9  | 2.29           | 0.007                    | 13.2                    | 0.004      |

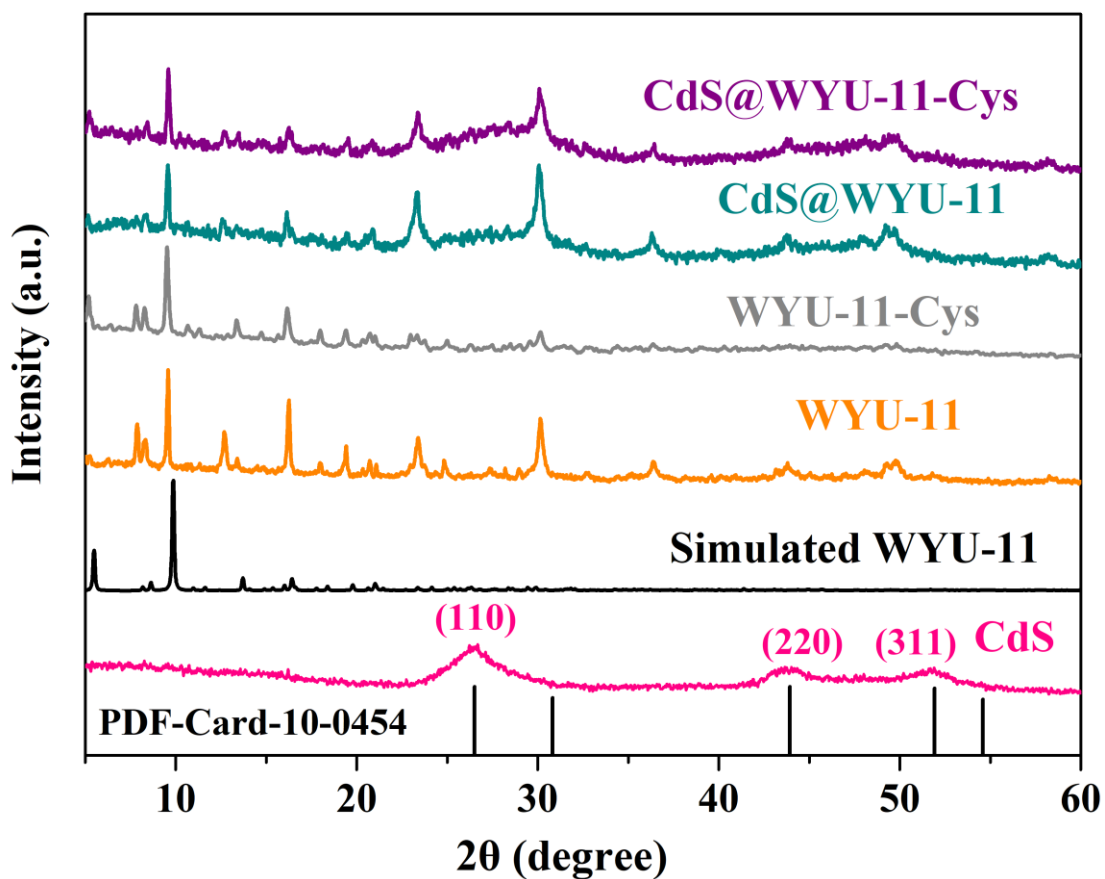

**Figure S1.** PXRD patterns of CdS, WYU-11, WYU-11-Cys, CdS@WYU-11 and CdS@WYU-11-Cys composites.

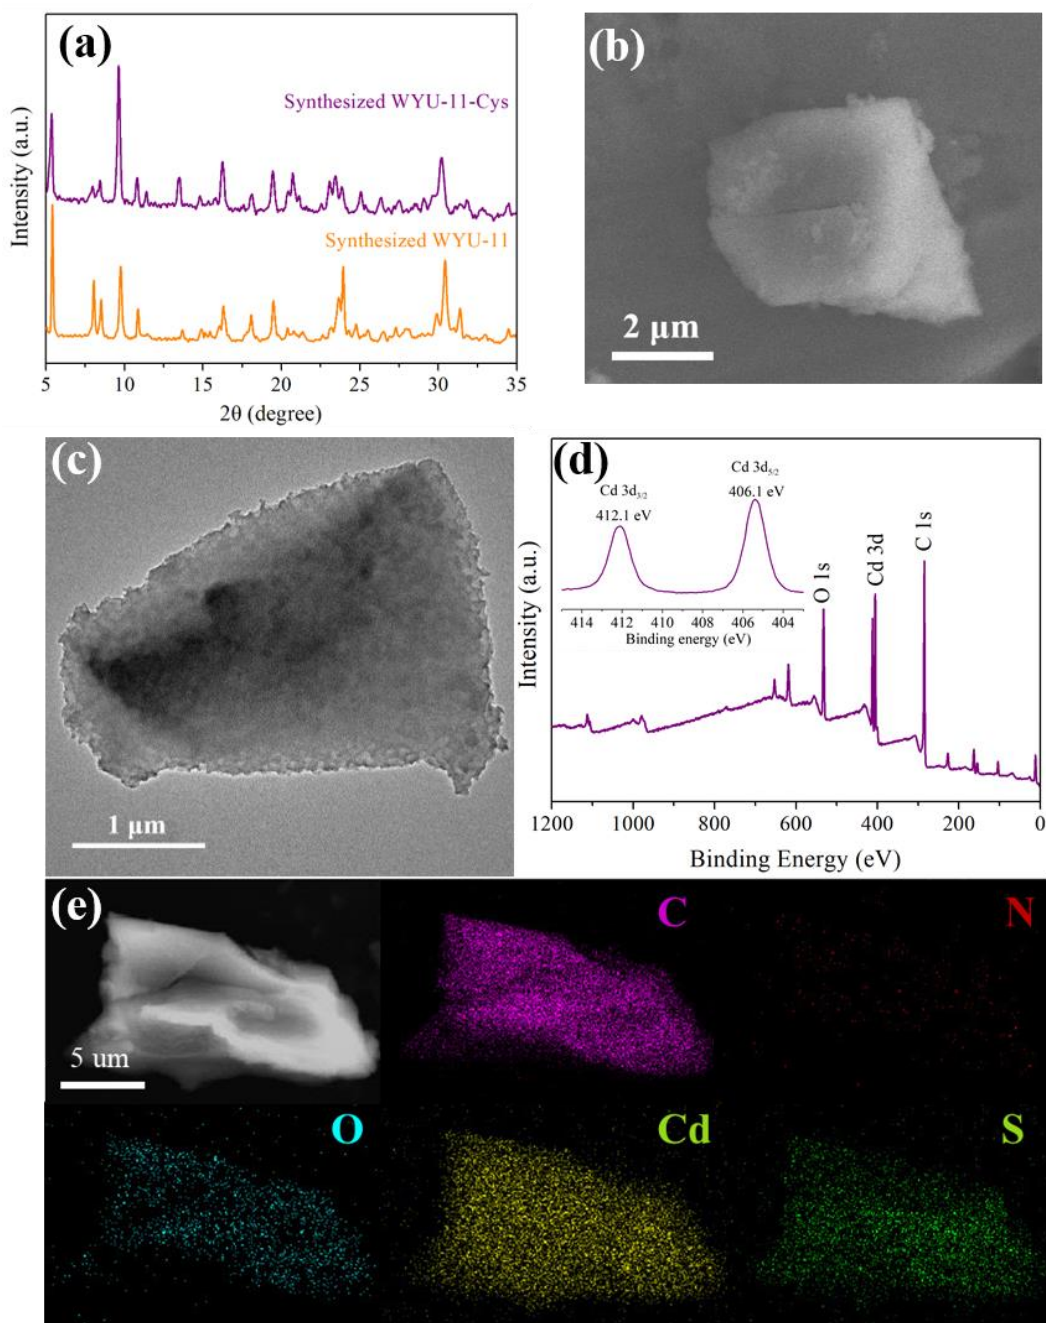

**Figure S2.** PXRD patterns (a), SEM (b), TEM (c), XPS spectrum (d) and EDS elemental mapping images (e) of WYU-11-Cys, respectively.

The bulk purity and irregular morphology of WYU-11-Cys were revealed by the PXRD patterns (Figure S2a), scanning electron microscopy (SEM) (Figure S2b) and TEM (Figure S2c). XPS spectrum indicates of the +3 valence nature of Cd in WYU-11-Cys (Figure S2d). EDX elemental mapping images indicated the evenly distribution of all the elements in the whole WYU-11-Cys material (Figure S2e).

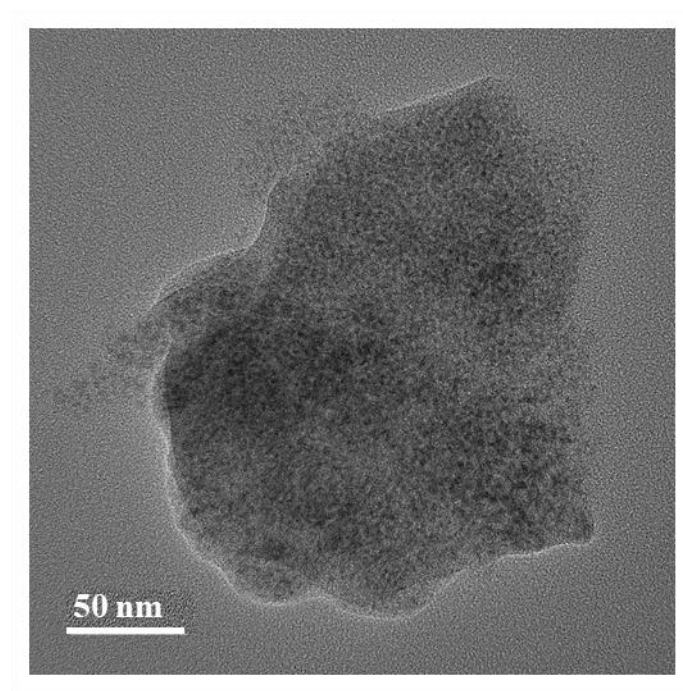

**Figure S3.** TEM images of CdS@WYU-11-Cys.

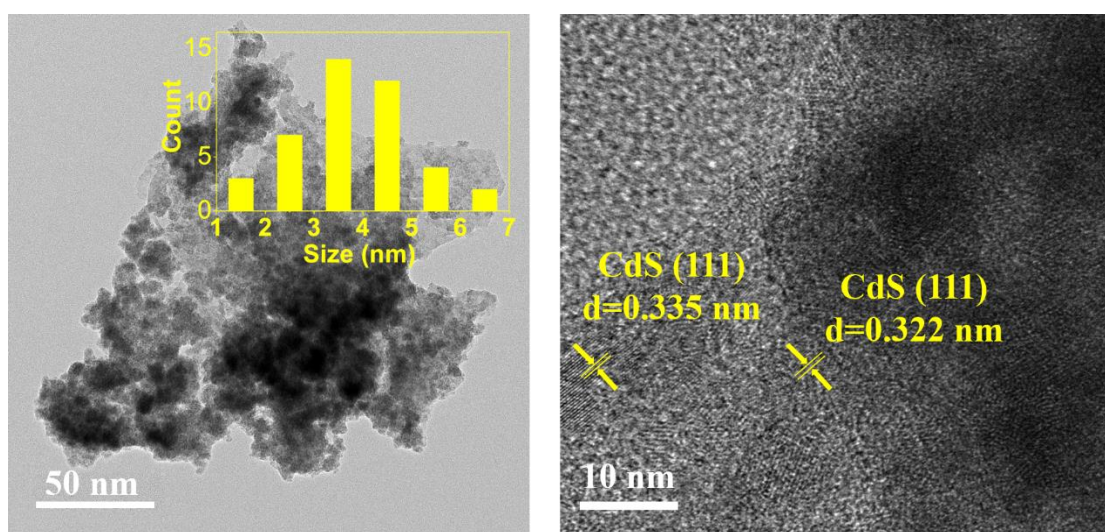

**Figure S4.** High resolution TEM images of CdS@WYU-11 and the size distribution of CdS (left);  
The lattice fringe of the CdS (right).

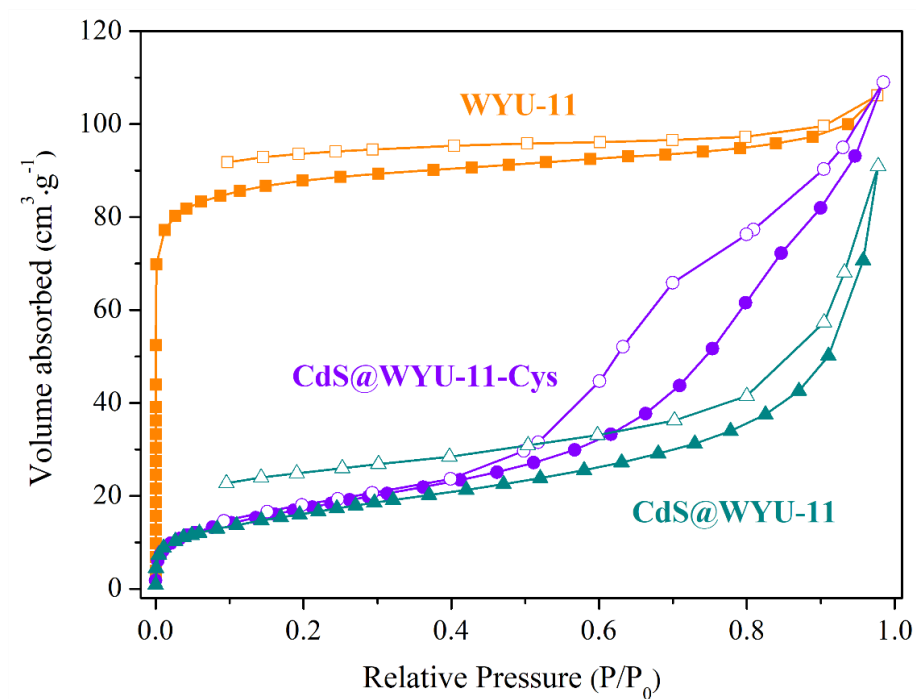

**Figure S5.** N<sub>2</sub> adsorption-desorption isotherm of WYU-11, CdS@WYU-11 and CdS@WYU-11-Cys composites at 77 K.

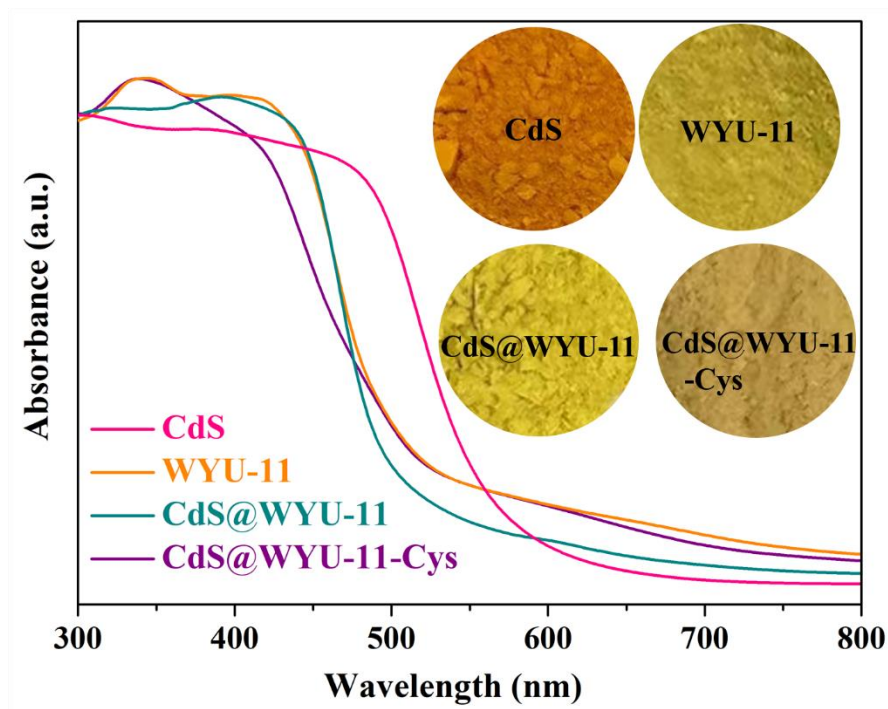

**Figure S6.** UV-vis DRS of WYU-11, CdS, CdS@WYU-11 and CdS@WYU-11-Cys composites.

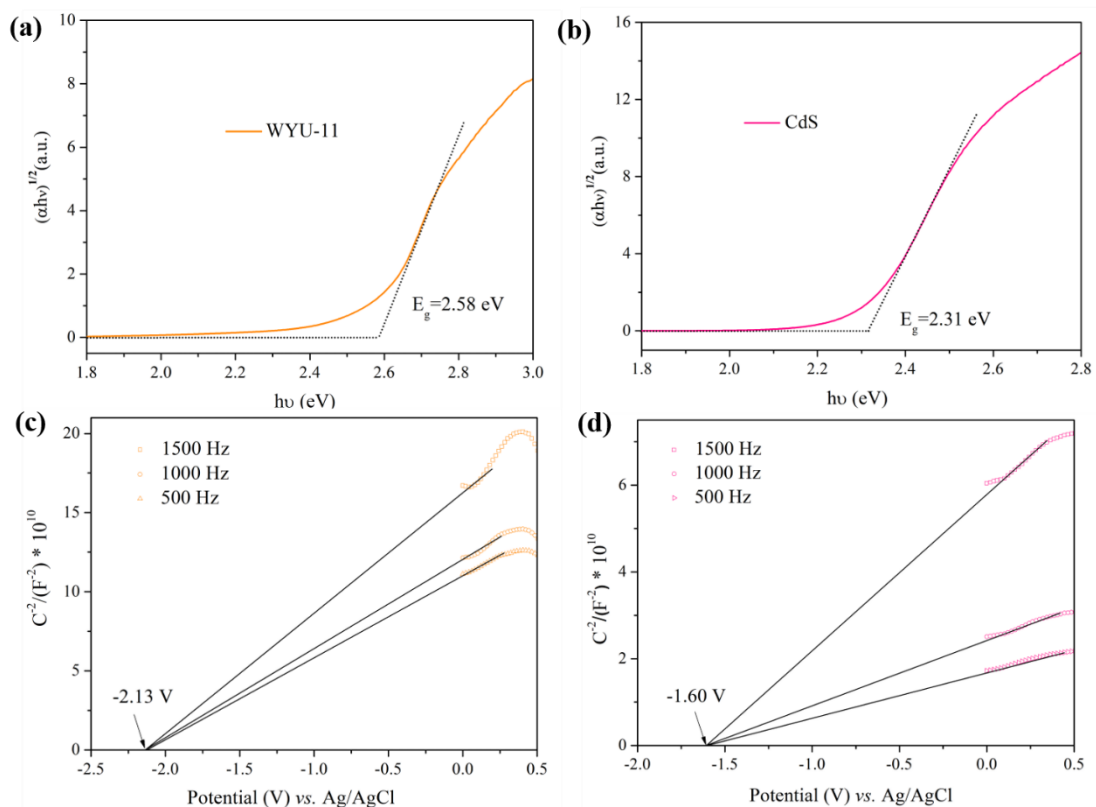

**Figure S7.** Tauc plot of WYU-11 (a) and CdS (b); Mott-Schottky plot of WYU-11 (c) and CdS (d) in a 0.1 M  $\text{Na}_2\text{SO}_4$  solution containing  $\text{K}_3\text{Fe}(\text{CN})_6/\text{K}_4\text{Fe}(\text{CN})_6$  (0.01 M).

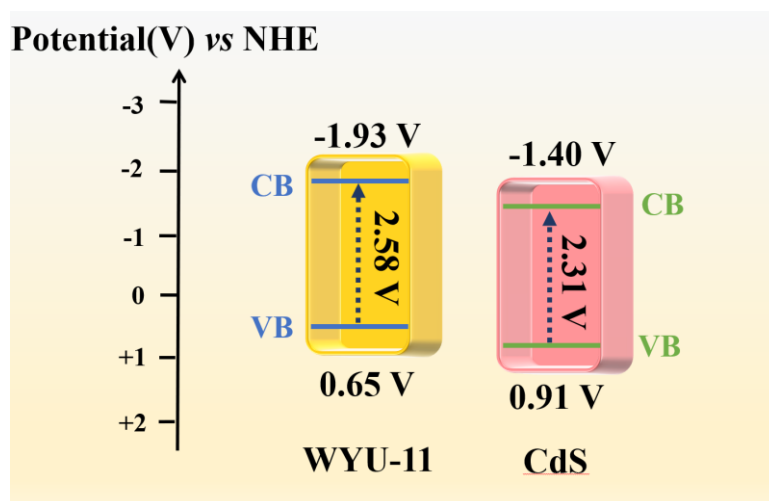

**Figure S8.** Band structure of WYU and CdS.

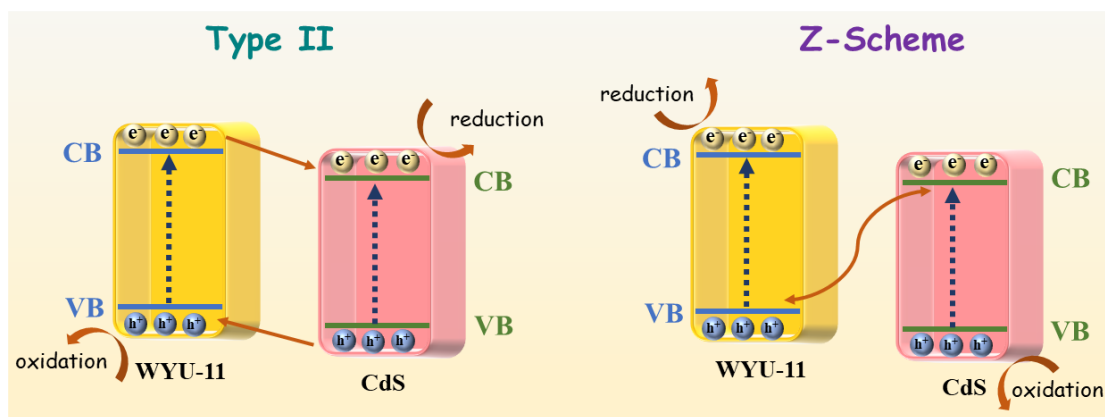

**Figure S9.** Scheme illustrating the potential type II or Z-scheme charge transfer pathways between WYU-11 and CdS in the CdS@WYU-11-Cys composites.

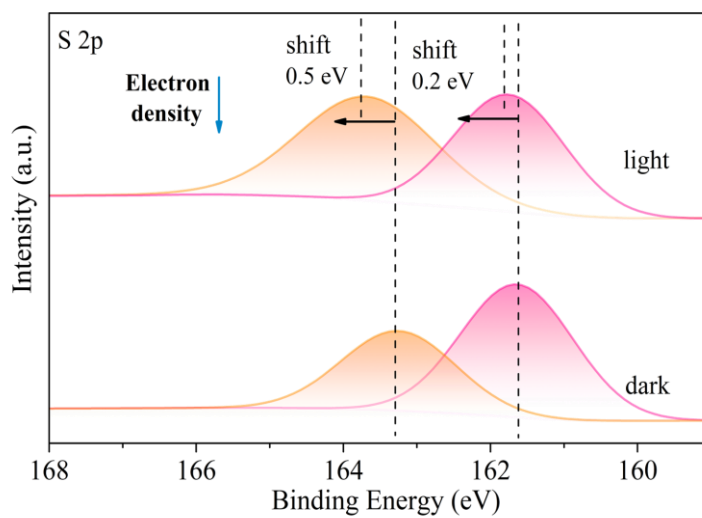

**Figure S10.** (h) S 2p of CdS@WYU-11-cys composite in the dark and under visible light irradiation ( $\lambda > 400$  nm).

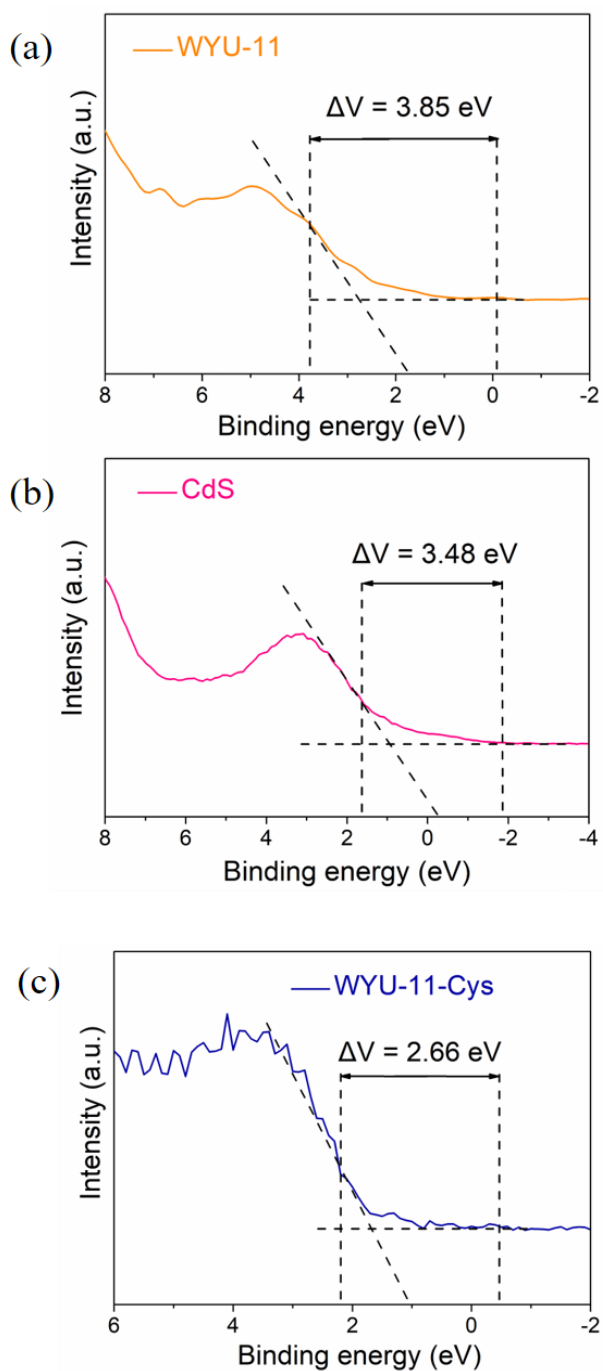

**Figure 11.** VB-XPS of (a)WYU-11, (b) CdS and (c) WYU-11-Cys, respectively.

The work functions ( $\Phi$ ) were calculated by the valence band X-ray photoelectron spectroscopy (VB-XPS) method based on the equation:  $\Phi = \phi + \Delta V$  ( $\phi$  represents work function of XPS analyzer,  $\phi = 4.2$  eV,  $\Delta V$  is the contact potential difference). The  $\Delta V$  values were obtained by analyzing the distance between two inflection points (IP) in VB XPS. Therefore, the work functions ( $\Phi$ ) of WYU-11, CdS and WYU-11-Cys were calculated to be 8.05, 7.68 and 6.86 eV, respectively.

#### 4. Photocatalytic Cyclization of Propargylic Amines with CO<sub>2</sub>

**Table S2.** Control experiments for the photocatalytic cyclization reaction of propargylic amine (**1a**) with CO<sub>2</sub><sup>a</sup>

| 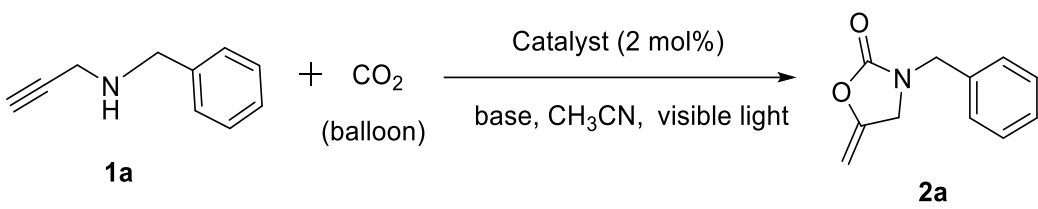 |                     |      |                        |
|------------------------------------------------------------------------------------|---------------------|------|------------------------|
| entry                                                                              | catalyst            | base | yield (%) <sup>b</sup> |
| 1                                                                                  | CdS@WYU-11-Cys      | TMG  | 97                     |
| 2                                                                                  | CdS@WYU-11          | TMG  | 30                     |
| 3 <sup>c</sup>                                                                     | H <sub>4</sub> PTTB | TMG  | trace                  |
| 4 <sup>d</sup>                                                                     | CdS                 | TMG  | 26                     |
| 5 <sup>e</sup>                                                                     | WYU-11              | TMG  | 19                     |
| 6                                                                                  | none                | TMG  | 0                      |
| 7                                                                                  | CdS@WYU-11-Cys      | none | trace                  |
| 8 <sup>f</sup>                                                                     | CdS@WYU-11-Cys      | TMG  | trace                  |
| 9 <sup>g</sup>                                                                     | CdS@WYU-11-Cys      | TMG  | trace                  |

<sup>a</sup> Reaction condition: **1a** (73 mg, 0.5 mmol), Catalyst (2 mol%), TMG (11.5 mg, 0.1 mmol), CH<sub>3</sub>CN (2 mL), visible light ( $\lambda > 400$  nm), 8 h, CO<sub>2</sub> (balloon). <sup>b</sup> The yield of the reaction was determined by <sup>1</sup>H NMR of the crude residue. <sup>c</sup> 0.01 mmol of H<sub>4</sub>PTTB. <sup>d</sup> 0.01 mmol of CdS. <sup>e</sup> 0.01 mmol of WYU-11. <sup>f</sup> N<sub>2</sub> atmosphere. <sup>g</sup> in the absence of visible light irradiation.

**Table S3.** Base optimization for the photocatalytic cyclization reaction of propargylic amine (**1a**) with CO<sub>2</sub>.<sup>a</sup>

| entry | catalyst       | base  | yield (%) <sup>b</sup> |
|-------|----------------|-------|------------------------|
| 1     | CdS@WYU-11-Cys | TMG   | 97                     |
| 2     | CdS@WYU-11-Cys | DBU   | 91                     |
| 3     | CdS@WYU-11-Cys | DIPEA | 6                      |
| 4     | CdS@WYU-11-Cys | TEA   | 14                     |

<sup>a</sup> Reaction condition: **1a** (73 mg, 0.5 mmol), Catalyst (13 mg, 2 mol%), TMG (11.5 mg, 0.1 mmol), CH<sub>3</sub>CN (2 mL), visible light (λ > 400 nm), 8 h, CO<sub>2</sub> (balloon). <sup>b</sup> The yield of the reaction was determined by <sup>1</sup>H NMR of the crude residue.

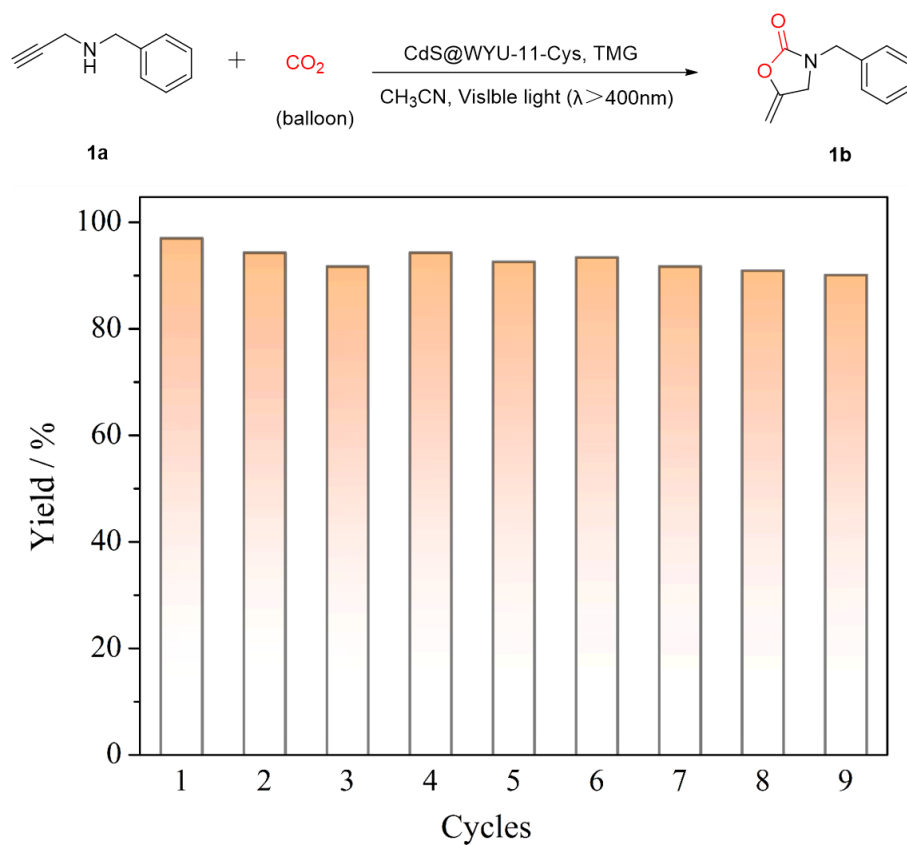

**Figure S12.** The cycling experiments of CdS@WYU-11-Cys for the photocatalytic cyclization of CO<sub>2</sub> and propargylic amines.

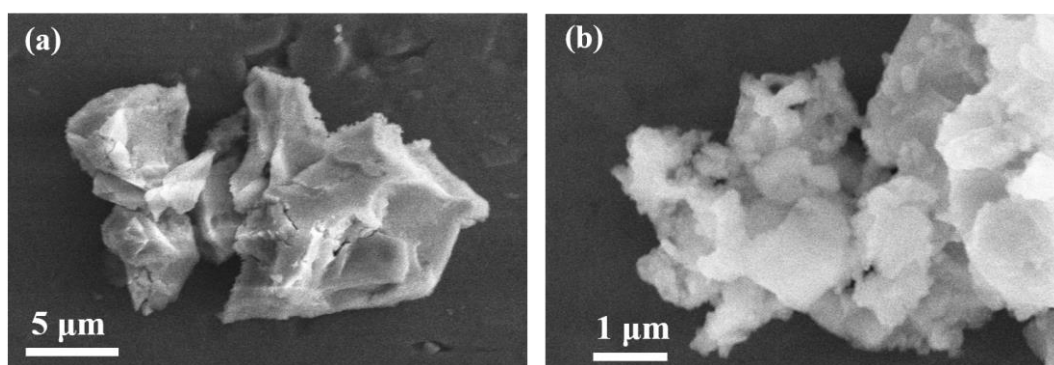

**Figure S13.** The SEM images of CdS@WYU-11-Cys before (a) and after (b) photocatalysis.

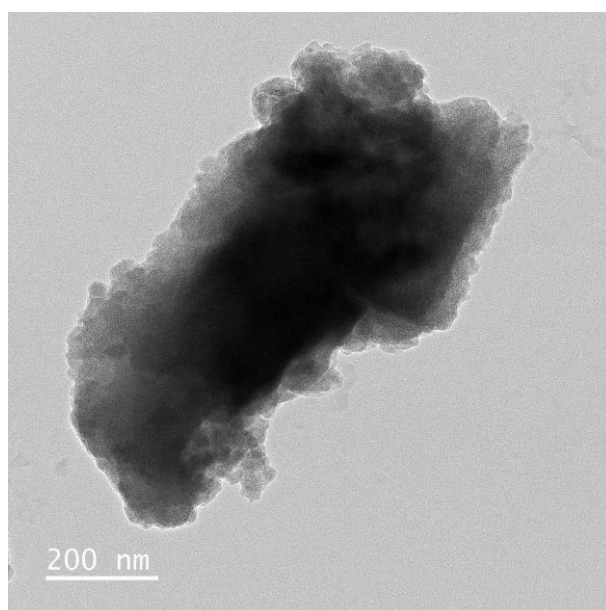

**Figure S14.** The TEM image of CdS@WYU-11-Cys after the second run.

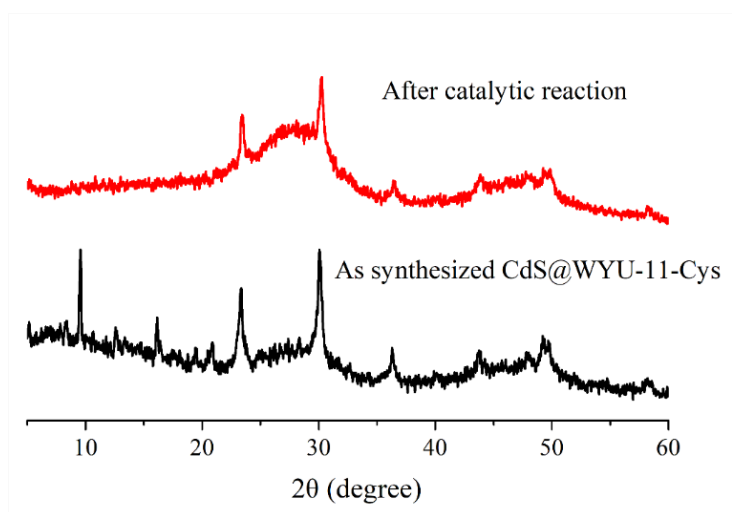

**Figure S15.** The PXRD patterns of CdS@WYU-11-Cys before and after catalytic reaction.

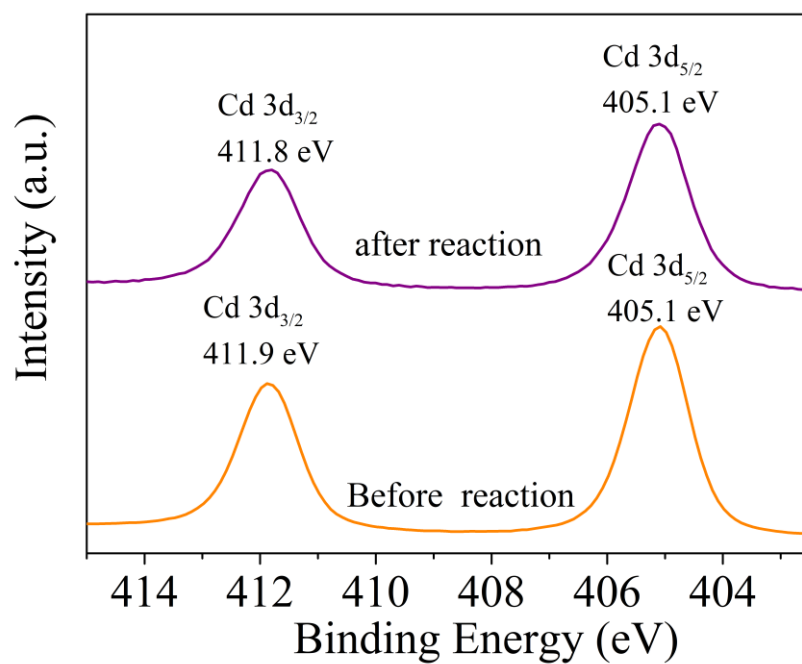

**Figure S16.** XPS spectrum of CdS@WYU-11-Cys before and after catalytic reaction.

**Table S4.** Comparison of CdS@WYU-11-Cys and other MOF-based catalysts for the cyclization reaction of propargylic amine with CO<sub>2</sub>.

| Catalysts                                                                                                                                                               | Amount of Catalyst | Visible light | T(°C) | Time(h) | Yield (%) | Reference                                                    |
|-------------------------------------------------------------------------------------------------------------------------------------------------------------------------|--------------------|---------------|-------|---------|-----------|--------------------------------------------------------------|
| Zn <sub>116</sub>                                                                                                                                                       | 0.27 mol%          | /             | 70    | 12      | 99        | <i>Angew. Chem. Int. Ed.</i> , <b>2020</b> , 132, 8664-8671  |
| MOF-Cu-Mg                                                                                                                                                               | 1.4 mol%           | /             | 25    | 6       | 93        | <i>Inorg. Chem.</i> , <b>2021</b> , 60, 13425–13433          |
| Ag <sub>27</sub> -MOF                                                                                                                                                   | 1 mol%             | /             | 25    | 6       | 97        | <i>Angew. Chem. Int. Ed.</i> , <b>2020</b> , 59, 20031–20036 |
| TNS-Ag8                                                                                                                                                                 | 0.1 mol%           | /             | 25    | 24      | 95        | <i>ACS Catal.</i> , <b>2018</b> , 8, 1384–1391               |
| NiBDP-AgS                                                                                                                                                               | 0.5 mol%           | /             | 25    | 4       | 99        | <i>ChemComm.</i> , <b>2018</b> , 54, 4469-4472               |
| TMOF-3-Ag                                                                                                                                                               | 10 mol%            | /             | 50    | 12      | 97        | <i>ACS Catal.</i> , <b>2018</b> , 8, 2519-2525               |
| Ag-MOF-1                                                                                                                                                                | 4 mol%             | /             | 25    | 24      | 95        | <i>ACS Omega</i> , <b>2019</b> , 4, 10828-10833              |
| MOF-SO <sub>3</sub> Ag                                                                                                                                                  | 0.15 mol%          | /             | 25    | 24      | 99        | <i>Inorg. Chem.</i> , <b>2020</b> , 59, 9765–9773            |
| Cu-TSP                                                                                                                                                                  | 2 mol%             | /             | 50    | 24      | 99        | <i>Inorg. Chem. Front.</i> , <b>2022</b> , 9, 3839–3844      |
| Ag@2,6-FPP-TAPT                                                                                                                                                         | 0.052 mol%         | /             | 50    | 2       | 99        | <i>Green Chem.</i> , <b>2022</b> , 24, 930–940               |
| Cu <sub>2</sub> O@ZIF-8                                                                                                                                                 | 5 mol%             | /             | 40    | 6       | 99        | <i>Angew. Chem.</i> , <b>2022</b> , e202114817               |
| Cu <sub>2</sub> O@MIL-101(Cr)-DABCO                                                                                                                                     | 2.5 mol%           | /             | 25    | 12      | 99        | <i>Green Chem.</i> , <b>2023</b> , 25, 1938–1947             |
| MOF-1a-Cd                                                                                                                                                               | 0.4 mol%           | /             | 60    | 24      | 82        | <i>Chemcatchem.</i> , <b>2017</b> , 9, 4598                  |
| WYU-11                                                                                                                                                                  | 1 mol%             | /             | 60    | 24      | 99        | <i>Inorg. Chem.</i> , <b>2023</b> , 62, 18553-18562          |
| Cu-TCPP(Fe)                                                                                                                                                             | 1 mol%             | /             | 50    | 24      | 98        | <i>Dalton Trans.</i> , <b>2024</b> , 53, 10060–10064         |
| Cu <sup>I</sup> /Cu <sup>II</sup> mixed-valence MOF                                                                                                                     | 0.5 mol%           | /             | 50    | 12      | 99        | <i>Inorg. Chem. Front.</i> , <b>2024</b> , 11, 6072-6078     |
| {[Cu <sub>5</sub> I <sub>6</sub> Th <sub>6</sub> (μ <sub>3</sub> O) <sub>4</sub> (μ <sub>3</sub> -OH) <sub>4</sub> (H <sub>2</sub> O) <sub>10</sub> (L) <sub>10</sub> ] | 1 mol%             | /             | r.t   | 6       | 98        | <i>Inorg. Chem.</i> , <b>2024</b> , 63, 13450–13458          |
| 1 <sub>0.1</sub> -2 <sub>0.4</sub> -3 <sub>0.5</sub> -JNM                                                                                                               | 3 mol%             | /             | r.t   | 3       | 99        | <i>J. Am. Chem. Soc.</i> , <b>2024</b> , 146, 19271–19278    |
| Cds@WYU-11-Cys                                                                                                                                                          | 2 mol%             | λ > 400 nm    | r. t  | 8       | 97        | <b>This work</b>                                             |

## 5. Reaction mechanism study

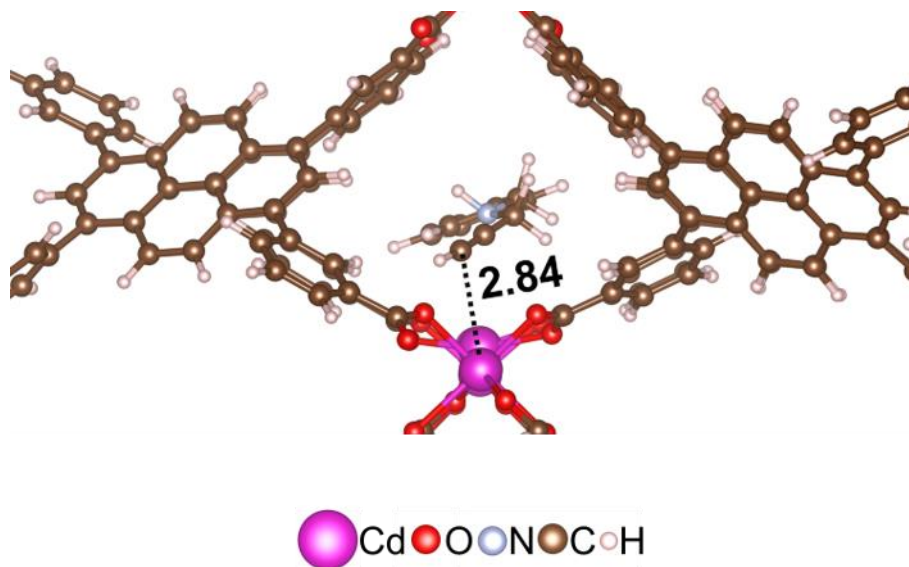

**Figure S17.** The cysteamine-grafted configuration and adsorption of *N*-benzylprop-2-yn-1-amine configuration within WYU-11. The distances are in Å.

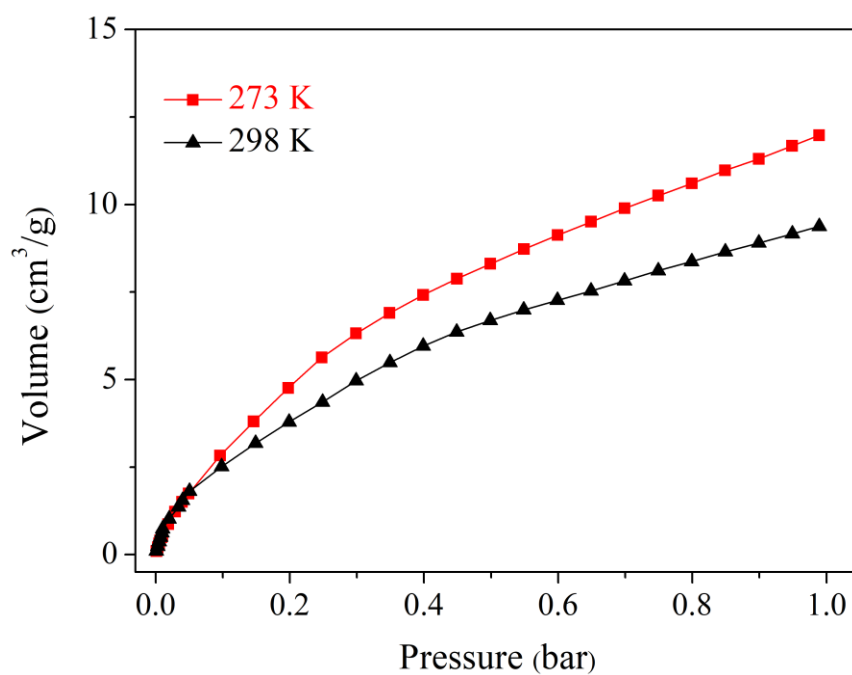

**Figure S18.** CO<sub>2</sub> isotherms of Cds@WYU-11-Cys at different temperatures.

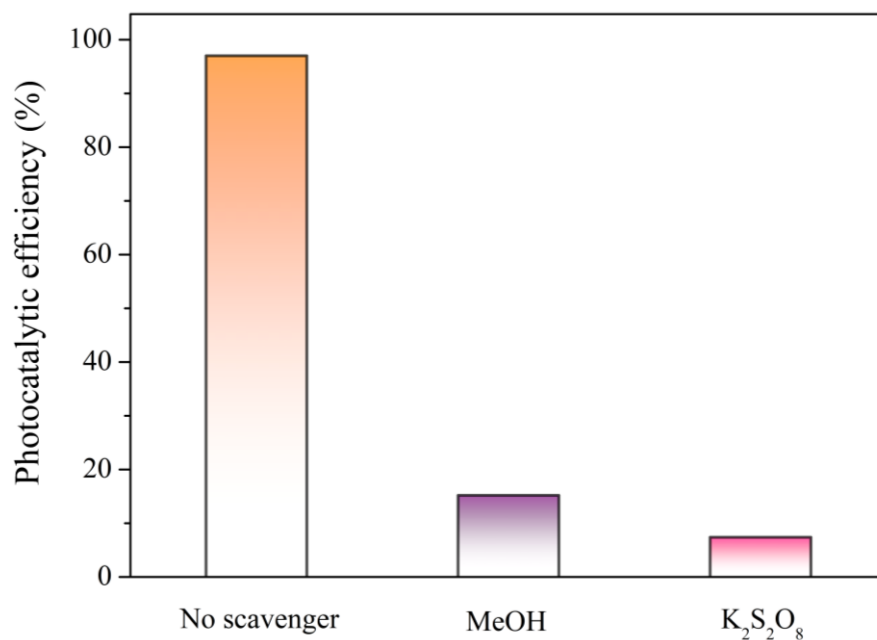

**Figure S19.** The photocatalytic cyclization reaction of propargylic amine with CO<sub>2</sub> in the presence of MeOH or K<sub>2</sub>S<sub>2</sub>O<sub>8</sub>.

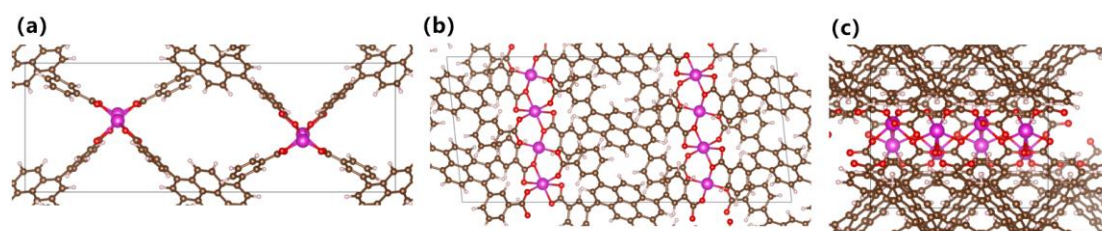

**Figure S20.** The optimized crystal structure (double-cell) in dehydrated form viewing along (a) *a* (14.24 Å), (b) *b* (11.14 Å) and (c) *c* (32.26 Å) directions.

## 6. Characterizations of propargylic amines and oxazolidinones

### Synthesis of propargylic amines (**1a-1l**)

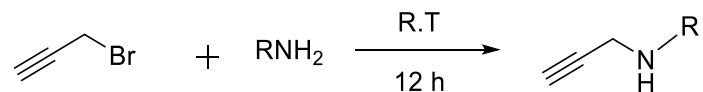

Terminal propargylic amines (**1a-1l**) were synthesized according to the previous report.<sup>[1, 3-4]</sup> In a typical experiment, propargylic bromide (0.45 mL, 4 mmol) was added into propargylic amine (20 mmol) dropwise via a constant pressure drop funnel over thirty minutes, and stirred overnight for about 12 h at ambient temperature. Then the resulting mixture was diluted in Et<sub>2</sub>O and washed with saturated aq. NaHCO<sub>3</sub> (3×10 mL), and dried over anhydrous Na<sub>2</sub>SO<sub>4</sub>. The reaction mixture was concentrated and purified by column chromatography on silica gel eluting with 10:1 petroleum ether/ethyl acetate to afford the corresponding product as yellow oil.

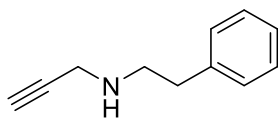

**1d**

Yellow oil has been obtained after being purified by column chromatography on silica gel (eluting with PE/Ethyl acetate = 10:1, R<sub>f</sub> = 0.6). <sup>1</sup>H NMR (500 MHz, CDCl<sub>3</sub>) δ 7.39 – 7.20 (m, 5H, C<sub>6</sub>H<sub>5</sub>), 3.47 (d, *J* = 2.4 Hz, 2H, CH<sub>2</sub>), 3.00 (t, *J* = 7.1 Hz, 2H, CH<sub>2</sub>), 2.85 (t, *J* = 7.1 Hz, 2H, CH<sub>2</sub>), 2.23 (t, *J* = 2.4 Hz, 1H, NH), 1.54 (s, 1H, CH).

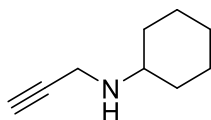

**1g**

Yellow oil has been obtained after being purified by column chromatography on silica gel (eluting with PE/Ethyl acetate = 5:1, R<sub>f</sub> = 0.3). <sup>1</sup>H NMR (500 MHz, CDCl<sub>3</sub>) δ 3.43 (d, *J* = 2.4 Hz, 2H, CH<sub>2</sub>), 2.63 (s, 1H, CH), 2.17 (t, *J* = 2.4 Hz, 1H, NH), 1.85 – 1.80 (m, 2H, C<sub>6</sub>H<sub>11</sub>), 1.74 – 1.67 (m, 2H, C<sub>6</sub>H<sub>11</sub>), 1.60 (d, *J* = 12.7 Hz, 2H, C<sub>6</sub>H<sub>11</sub>), 1.29 – 1.01 (m, 5H, C<sub>6</sub>H<sub>11</sub>).

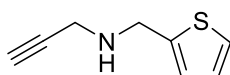

**1k**

Yellow oil has been obtained after being purified by column chromatography on silica gel (eluting with PE/Ethyl acetate = 5:1, R<sub>f</sub> = 0.5). <sup>1</sup>H NMR (500 MHz, CDCl<sub>3</sub>) δ 7.32 – 7.18 (m, 1H, CH), 6.96 (dd, *J* = 7.2, 3.0, 1.8 Hz, 2H, CH), 4.08 (d, *J* = 3.2 Hz, 2H, CH<sub>2</sub>), 3.56 – 3.39 (m, 2H, CH<sub>2</sub>), 2.28 (t, *J* = 2.4 Hz, 1H, NH), 1.77 (s, 1H, CH).

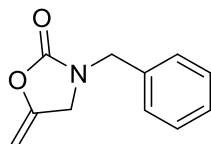

**2a**

Yellow oil (82.3 mg, 97%) has been obtained after being purified by column chromatography on silica gel (eluting with PE/Ethyl acetate = 10:1,  $R_f$  = 0.4).  $^1\text{H}$  NMR (500 MHz,  $\text{CDCl}_3$ )  $\delta$  7.46 – 7.20 (m, 5H,  $\text{C}_6\text{H}_5$ ), 4.72 (d,  $J$  = 2.9 Hz, 1H,  $\text{C}=\text{CH}_2$ ), 4.45 (s, 2H,  $\text{CH}_2$ ), 4.23 (d,  $J$  = 3.1 Hz, 1H,  $\text{C}=\text{CH}_2$ ), 4.01 (t,  $J$  = 2.4 Hz, 2H,  $\text{CH}_2$ ).

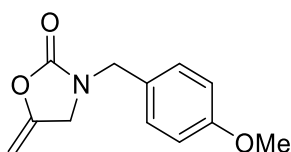

**2b**

Yellow oil (84 mg, 77%) has been obtained after being purified by column chromatography on silica gel (eluting with PE/Ethyl acetate = 10:1,  $R_f$  = 0.3).  $^1\text{H}$  NMR (500 MHz,  $\text{CDCl}_3$ )  $\delta$  7.21 – 7.16 (m, 2H,  $\text{C}_6\text{H}_4$ ), 6.89 – 6.84 (m, 2H,  $\text{C}_6\text{H}_4$ ), 4.70 (dd,  $J$  = 5.6, 2.7 Hz, 1H,  $\text{C}=\text{CH}_2$ ), 4.39 (s, 2H,  $\text{CH}_2$ ), 4.21 – 4.22 (m, 1H,  $\text{C}=\text{CH}_2$ ), 3.99 (t,  $J$  = 2.4 Hz, 2H,  $\text{CH}_2$ ), 3.79 (s, 3H,  $\text{CH}_3$ ).

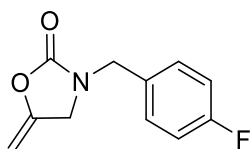

**2c**

Yellow oil (88.2 mg, 85%) has been obtained after being purified by column chromatography on silica gel (eluting with PE/Ethyl acetate = 10:1,  $R_f$  = 0.4).  $^1\text{H}$  NMR (500 MHz,  $\text{CDCl}_3$ )  $\delta$  7.27 – 7.21 (m, 2H,  $\text{C}_6\text{H}_4$ ), 7.02 (dd,  $J$  = 12.0, 5.3 Hz, 2H,  $\text{C}_6\text{H}_4$ ), 4.71 (dd,  $J$  = 5.5, 2.7 Hz, 1H,  $\text{C}=\text{CH}_2$ ), 4.41 (s, 2H,  $\text{CH}_2$ ), 4.24 (dd,  $J$  = 5.1, 2.2 Hz, 1H,  $\text{C}=\text{CH}_2$ ), 4.01 (t,  $J$  = 2.3 Hz, 2H,  $\text{CH}_2$ ).

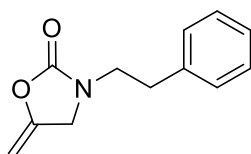

**2d**

Yellow oil (91 mg, 90%) has been obtained after being purified by column chromatography on silica gel (eluting with PE/Ethyl acetate = 10:1,  $R_f$  = 0.3).  $^1\text{H}$  NMR (500 MHz,  $\text{CDCl}_3$ )  $\delta$  7.37 – 7.19 (m, 5H,  $\text{C}_6\text{H}_5$ ), 4.76 – 4.67 (m, 1H,  $\text{C}=\text{CH}_2$ ), 4.27 – 4.20 (m, 1H,  $\text{C}=\text{CH}_2$ ), 4.01 (t,  $J$  = 2.2 Hz, 2H,  $\text{CH}_2$ ), 3.57 (dd,  $J$  = 1.6 Hz, 2H,  $\text{CH}_2$ ), 2.91 (t,  $J$  = 7.2 Hz, 2H,  $\text{CH}_2$ ).

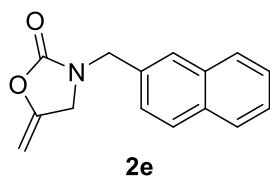

Yellow solid (97.6 mg, 81.7%) has been obtained after being purified by column chromatography on silica gel (eluting with PE/Ethyl acetate = 5:1,  $R_f$  = 0.3).  $^1\text{H}$  NMR (500 MHz,  $\text{CDCl}_3$ )  $\delta$  7.88 – 7.81 (m, 3H,  $\text{C}_{10}\text{H}_7$ ), 7.72 (s, 1H,  $\text{C}_{10}\text{H}_7$ ), 7.54 – 7.46 (m, 2H,  $\text{C}_{10}\text{H}_7$ ), 7.40 (dd,  $J$  = 8.4, 1.7 Hz, 1H,  $\text{C}_{10}\text{H}_7$ ), 4.74 (dd,  $J$  = 5.7, 2.6 Hz, 1H,  $\text{C}=\text{CH}_2$ ), 4.62 (s, 2H,  $\text{CH}_2$ ), 4.22 (dt,  $J$  = 3.1, 2.2 Hz, 1H,  $\text{C}=\text{CH}_2$ ), 4.03 (t,  $J$  = 2.4 Hz, 2H,  $\text{CH}_2$ ).

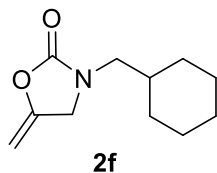

Yellow oil (78.4 mg, 80%) has been obtained after being purified by column chromatography on silica gel (eluting with PE/Ethyl acetate = 5:1,  $R_f$  = 0.3).  $^1\text{H}$  NMR (500 MHz,  $\text{CDCl}_3$ )  $\delta$  4.68 (dd,  $J$  = 5.5, 2.7 Hz, 1H,  $\text{C}=\text{CH}_2$ ), 4.24 (dd,  $J$  = 5.2, 2.2 Hz, 1H,  $\text{C}=\text{CH}_2$ ), 4.13 (t,  $J$  = 2.4 Hz, 2H,  $\text{CH}_2$ ), 3.07 (d,  $J$  = 7.4 Hz, 2H,  $\text{CH}_2$ ), 1.71 – 1.61 (m, 5H,  $\text{C}_6\text{H}_{11}$ ), 1.16 (d,  $J$  = 9.4 Hz, 4H,  $\text{C}_6\text{H}_{11}$ ), 0.93 (s, 2H,  $\text{C}_6\text{H}_{11}$ ).

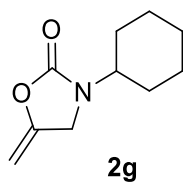

Yellow oil (85.2 mg, 94%) has been obtained after being purified by column chromatography on silica gel (eluting with PE/Ethyl acetate = 5:1,  $R_f$  = 0.2).  $^1\text{H}$  NMR (500 MHz,  $\text{CDCl}_3$ )  $\delta$  4.69 (dd,  $J$  = 5.5, 2.7 Hz, 1H,  $\text{C}=\text{CH}_2$ ), 4.25 (dd,  $J$  = 5.2, 2.2 Hz, 1H,  $\text{C}=\text{CH}_2$ ), 4.11 (t,  $J$  = 2.4 Hz, 2H,  $\text{CH}_2$ ), 3.69 (s, 1H,  $\text{C}_6\text{H}_{11}$ ), 1.79 (d,  $J$  = 8.4 Hz, 4H,  $\text{C}_6\text{H}_{11}$ ), 1.65 (d,  $J$  = 13.0 Hz, 1H,  $\text{C}_6\text{H}_{11}$ ), 1.38 – 1.28 (m, 4H,  $\text{C}_6\text{H}_{11}$ ), 1.06 (dd,  $J$  = 3.0 Hz, 1H,  $\text{C}_6\text{H}_{11}$ ).

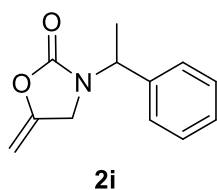

Yellow oil (67.2 mg, 66%) has been obtained after being purified by column chromatography on silica gel (eluting with PE/Ethyl acetate = 10:1,  $R_f$  = 0.5).  $^1\text{H}$  NMR (500 MHz,  $\text{CDCl}_3$ )  $\delta$  7.39 – 7.29 (m, 5H,  $\text{C}_6\text{H}_5$ ), 5.26 (d,  $J$  = 7.1 Hz, 1H, CH), 4.70 (dd,  $J$  = 5.6, 2.7 Hz, 1H,  $\text{C}=\text{CH}_2$ ), 4.21 (dt,  $J$  = 3.1, 2.2 Hz, 1H,  $\text{C}=\text{CH}_2$ ), 4.10 (dt,  $J$  = 14.2, 2.4 Hz, 1H,  $\text{CH}_2$ ), 3.76 (dt,  $J$  = 2.4 Hz, 1H,  $\text{CH}_2$ ), 1.59 (d,  $J$  = 7.1 Hz, 3H,  $\text{CH}_3$ ).

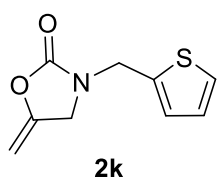

Yellow oil (89.2 mg, 92%) has been obtained after being purified by column chromatography on silica gel (eluting with PE/Ethyl acetate = 5:1,  $R_f$  = 0.5).  $^1\text{H}$  NMR (500 MHz,  $\text{CDCl}_3$ )  $\delta$  7.31 – 7.23 (m, 1H,  $\text{C}_4\text{H}_3\text{S}$ ), 7.03 – 6.93 (m, 2H,  $\text{C}_4\text{H}_3\text{S}$ ), 4.72 (dd,  $J$  = 5.7, 2.7 Hz, 1H,  $\text{C}=\text{CH}_2$ ), 4.63 (s, 2H,  $\text{CH}_2$ ), 4.25 (dd,  $J$  = 0.9 Hz, 1H,  $\text{C}=\text{CH}_2$ ), 4.09 (t,  $J$  = 2.4 Hz, 2H,  $\text{CH}_2$ ).

## **NMR spectra of substrates and products**

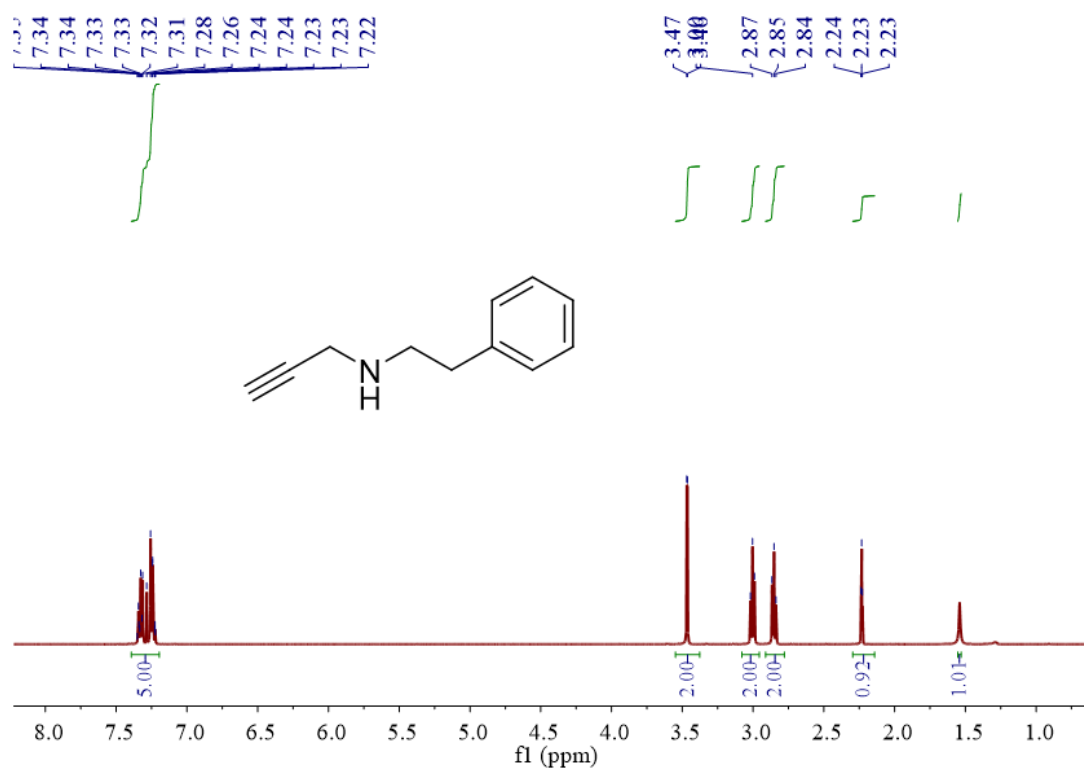

$^1\text{H}$  NMR (500 MHz,  $\text{CDCl}_3$ ) spectrum of **1d**.

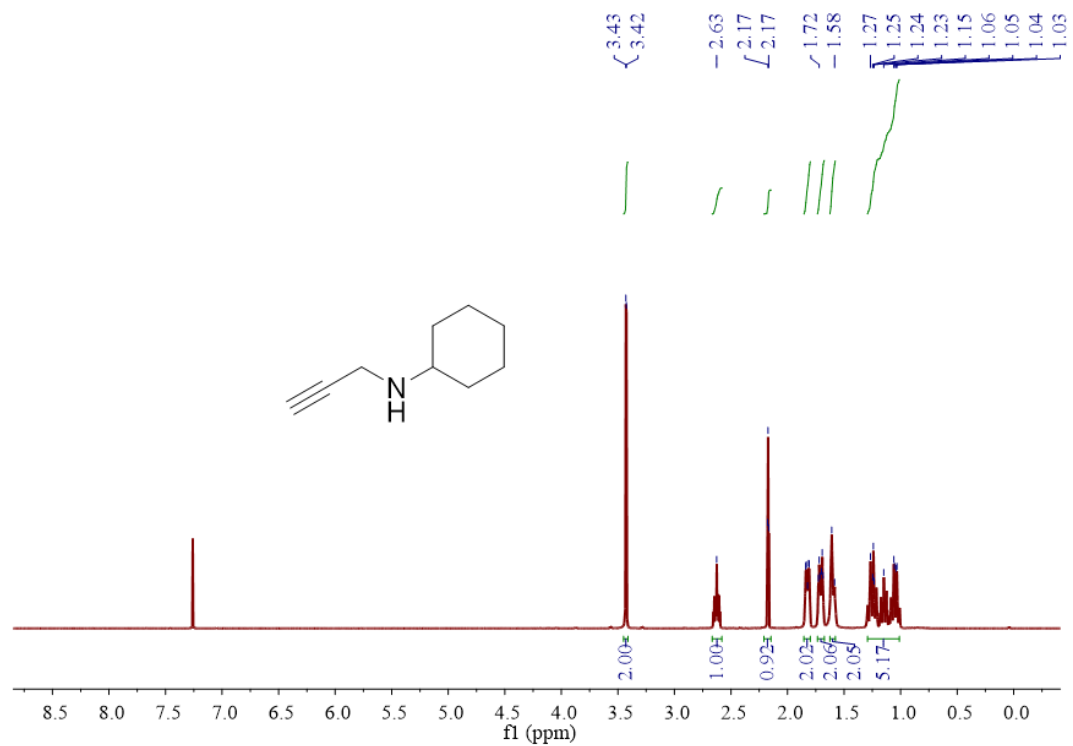

$^1\text{H}$  NMR (500 MHz,  $\text{CDCl}_3$ ) spectrum of **1g**.

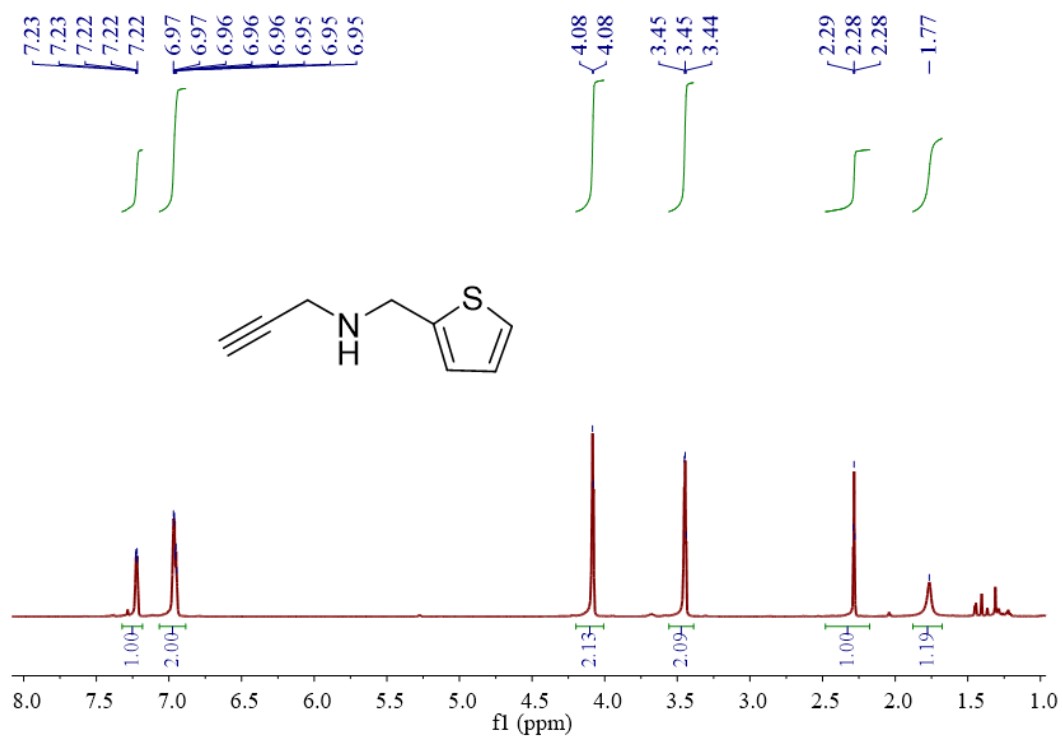

<sup>1</sup>H NMR (500 MHz, CDCl<sub>3</sub>) spectrum of **1k**.

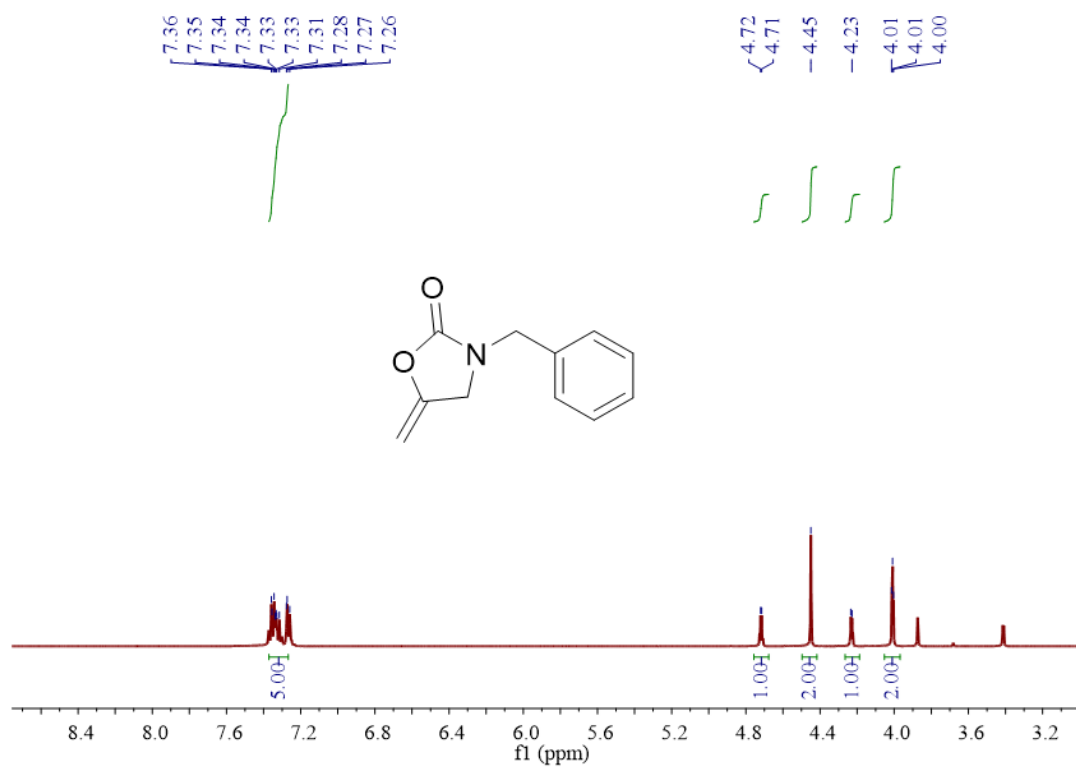

<sup>1</sup>H NMR (500 MHz, CDCl<sub>3</sub>) spectrum of **2a**.

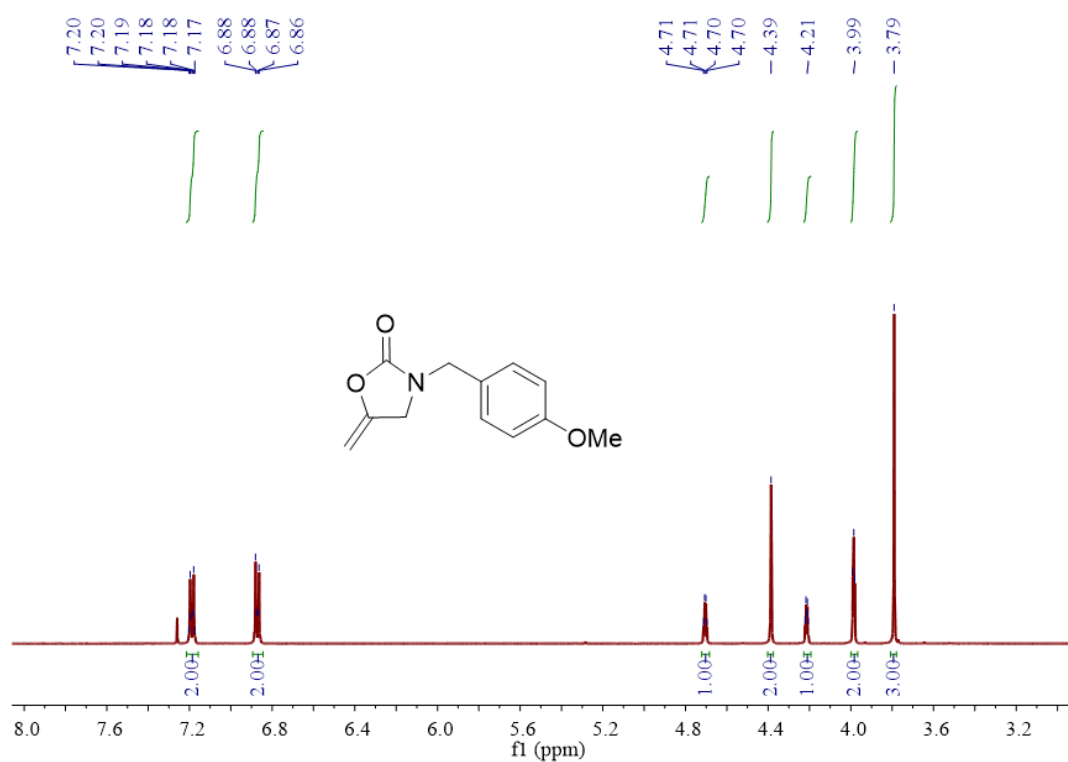

<sup>1</sup>H NMR (500 MHz, CDCl<sub>3</sub>) spectrum of **2b**.

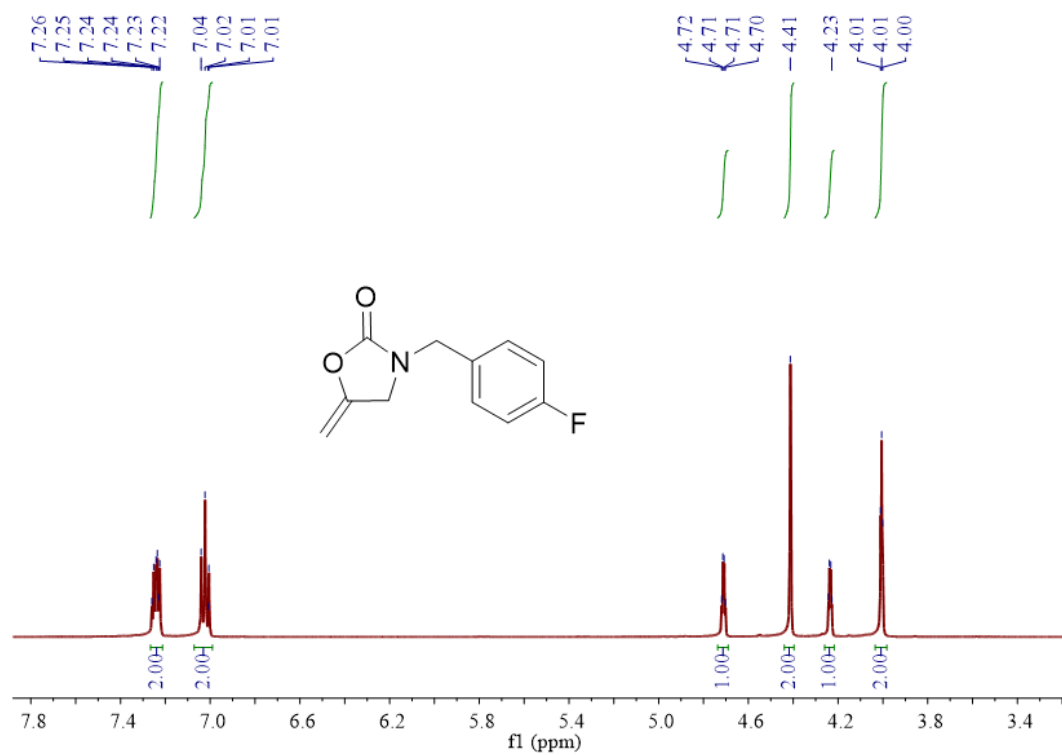

<sup>1</sup>H NMR (500 MHz, CDCl<sub>3</sub>) spectrum of **2c**.

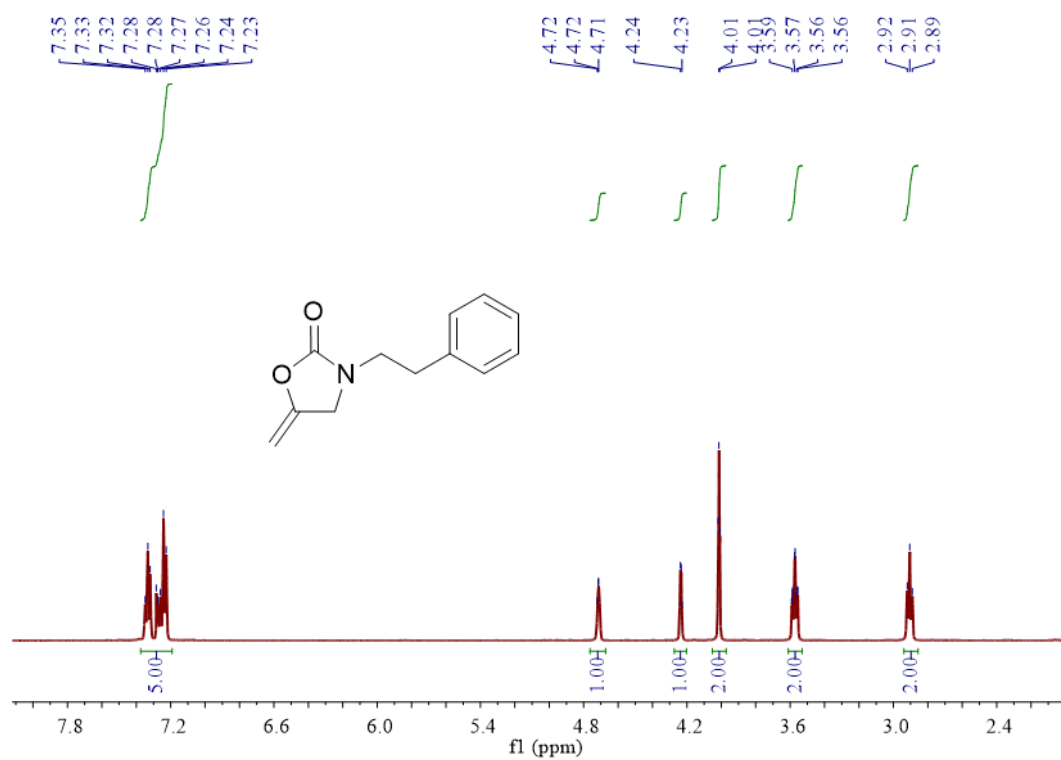

<sup>1</sup>H NMR (500 MHz, CDCl<sub>3</sub>) spectrum of **2d**.

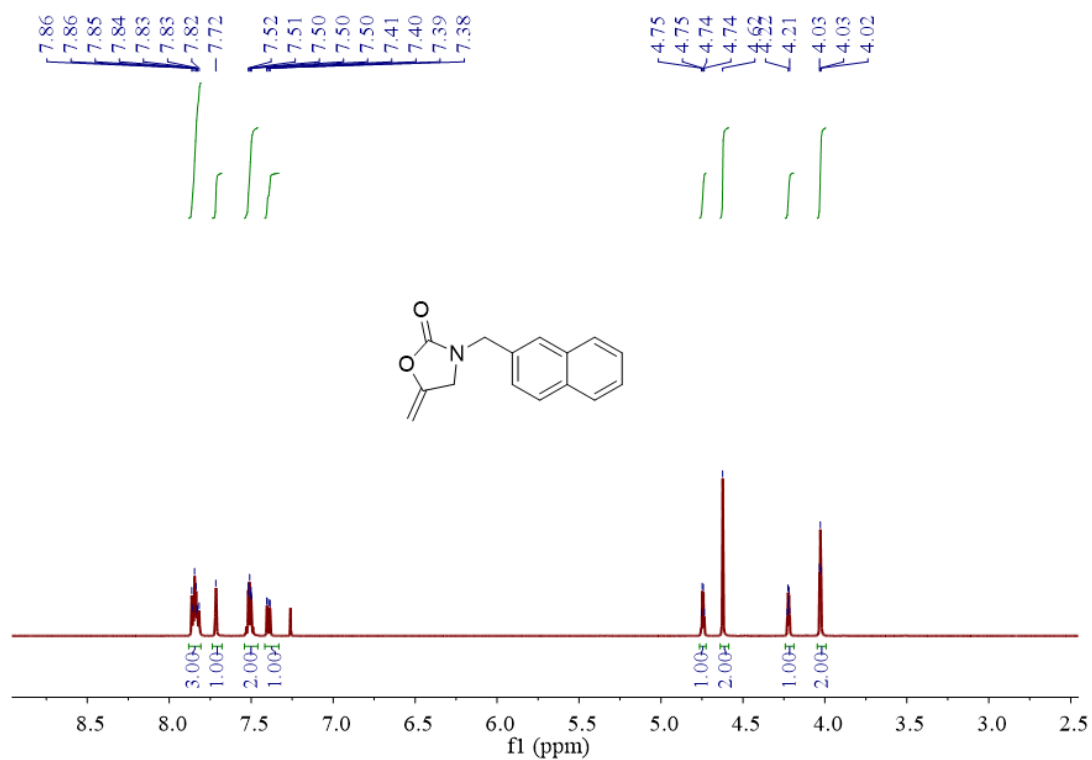

<sup>1</sup>H NMR (500 MHz, CDCl<sub>3</sub>) spectrum of **2e**.<sup>1</sup>

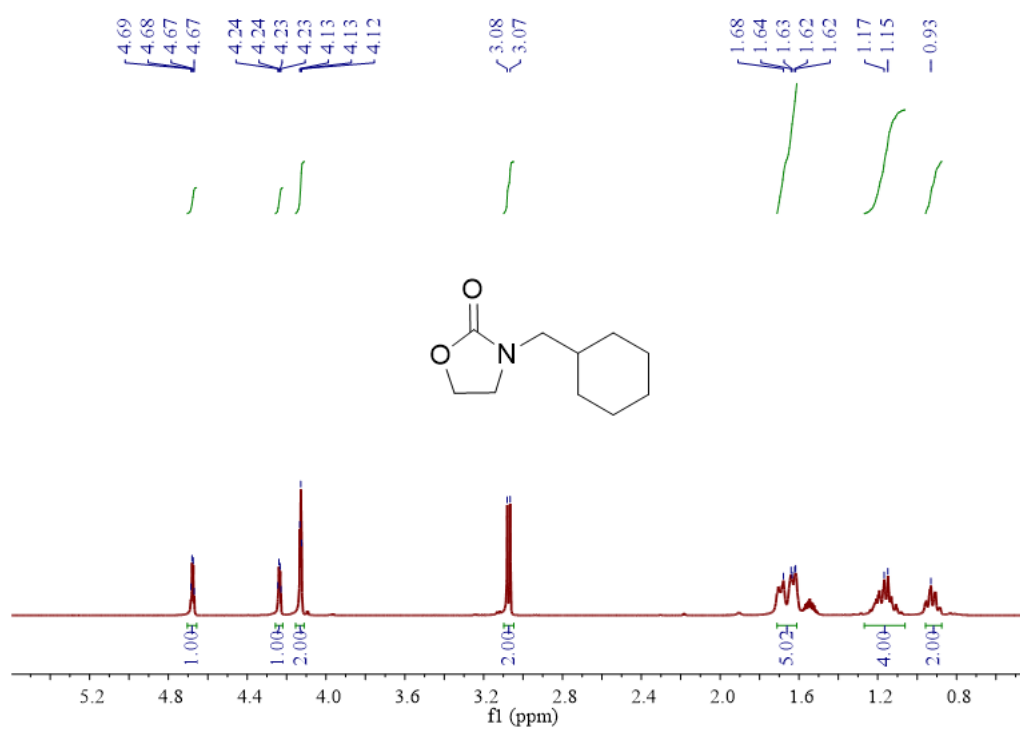

<sup>1</sup>H NMR (500 MHz, CDCl<sub>3</sub>) spectrum of **2f**.

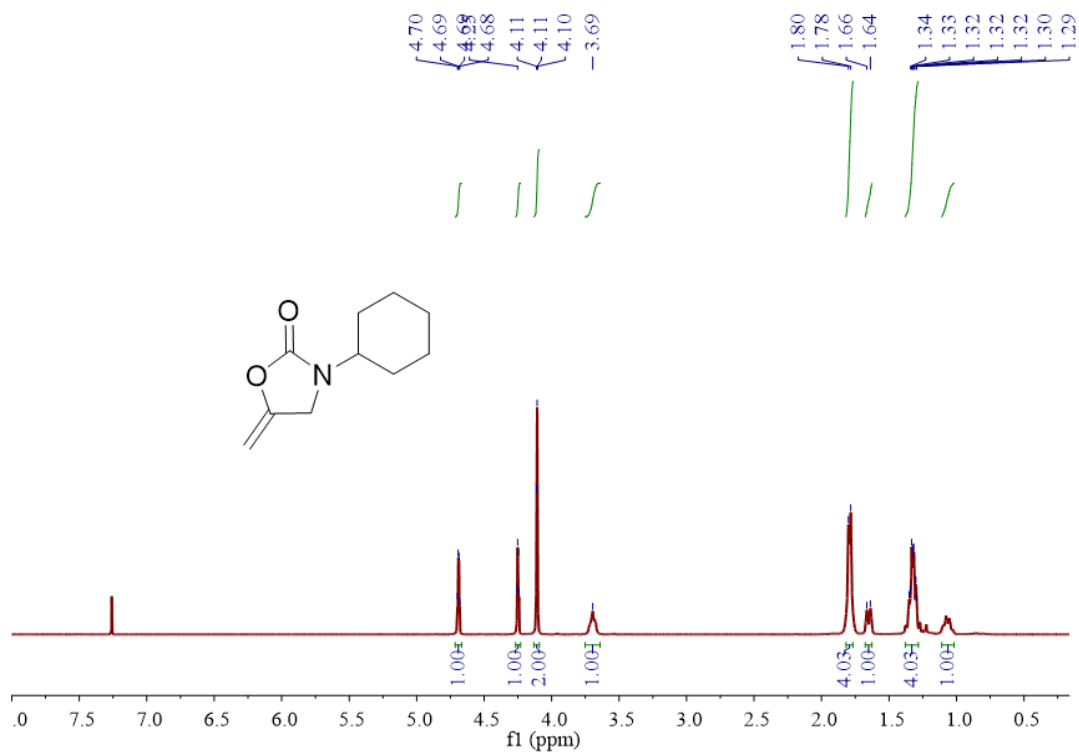

<sup>1</sup>H NMR (500 MHz, CDCl<sub>3</sub>) spectrum of **2g**.

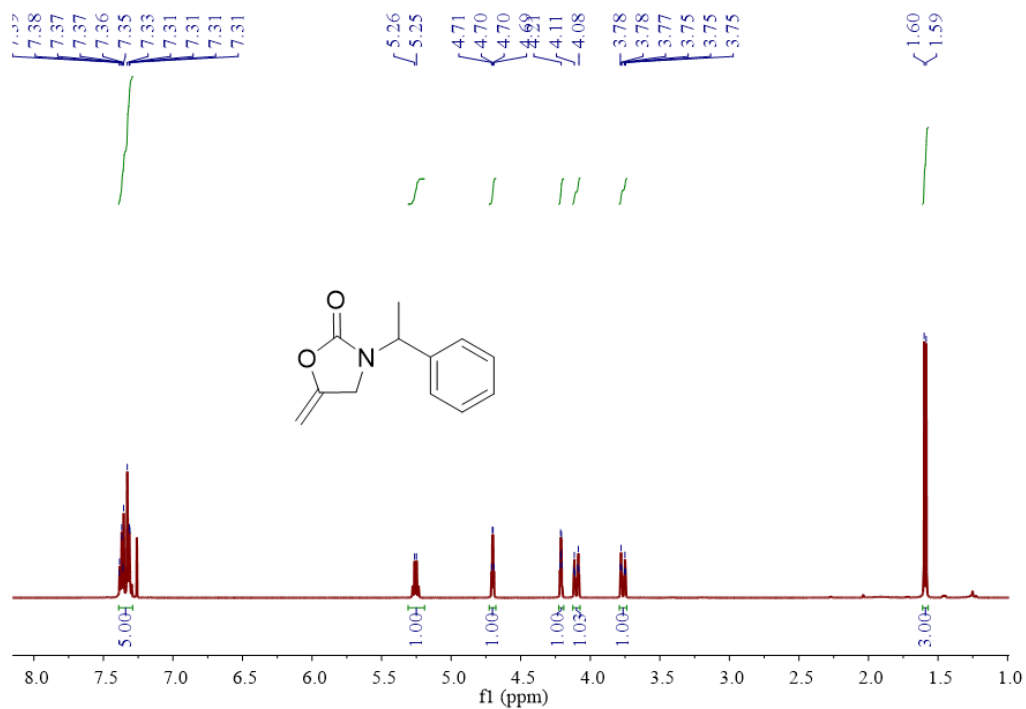

<sup>1</sup>H NMR (500 MHz, CDCl<sub>3</sub>) spectrum of **2i**.

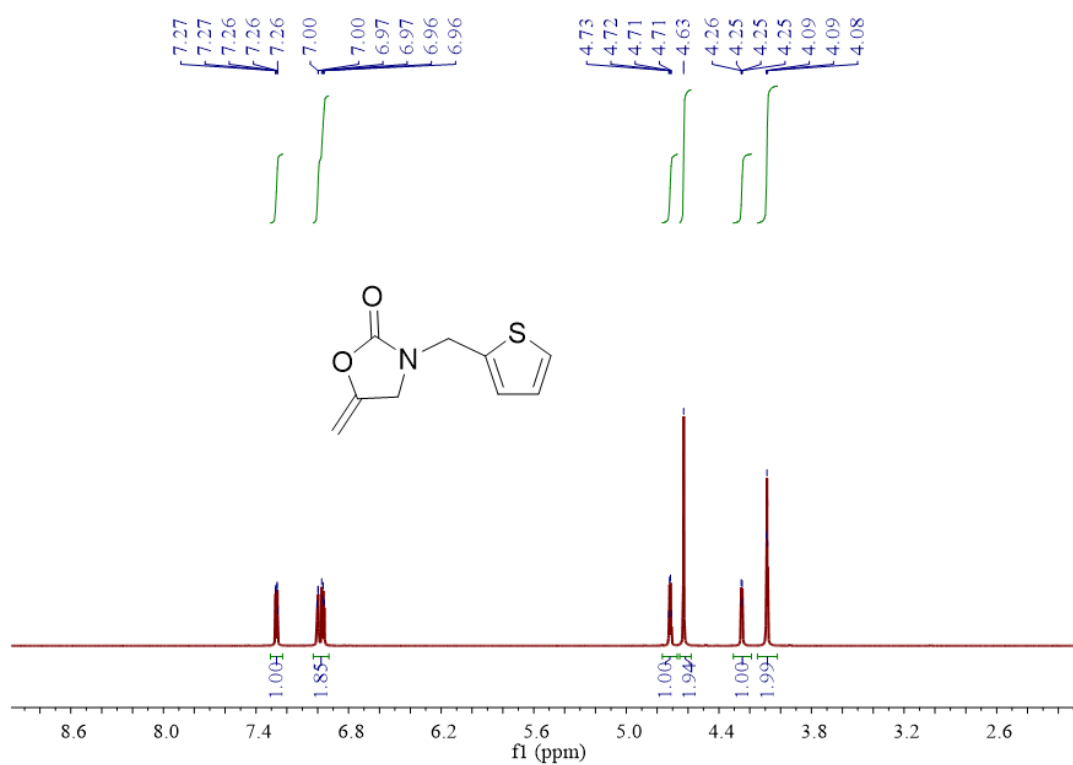

<sup>1</sup>H NMR (500 MHz, CDCl<sub>3</sub>) spectrum of **2k**.

## Reference

1. Zhao, X.; Qin, B.-B.; He, T.; Wang, H.-P.; Liu, J. Stable Pyrene-Based Metal–Organic Framework for Cyclization of Propargylic Amines with CO<sub>2</sub> and Detection of Antibiotics in Water. *Inorg. Chem.* **2023**, *62*, 18553–18562.
2. Liu, X.; Wang, M.-Y.; Wang, S.-Y.; Wang, Q.; He, L.-N. In Situ Generated Zinc (II) Catalyst for Incorporation of CO<sub>2</sub> into 2-Oxazolidinones with Propargylic Amines at Atmospheric Pressure, *ChemSusChem*, **2017**, *10*, 1210–1216.
3. Zhang, C.-H.; Hu, T.-D.; Zhai, Y.-T.; Zhang, Y.-X.; Wu, Z.-L. Stepwise engineering of the pore environment within metal–organic frameworks for green conversion of CO<sub>2</sub> and propargylic amines, *Green Chem.* **2023**, *25*, 1938- 1947.
